# Supplementary material
Source: Springer Nature journal article supplement (https://www.springermedizin.de/resource/supplementary/12914_2009_85_MOESM2_ESM.pdf/9537482)
Supplement: MOESM2 [file 9537482]

# DISTRICT MAP DISTRICT MEHERPUR DIVISION KHULNA

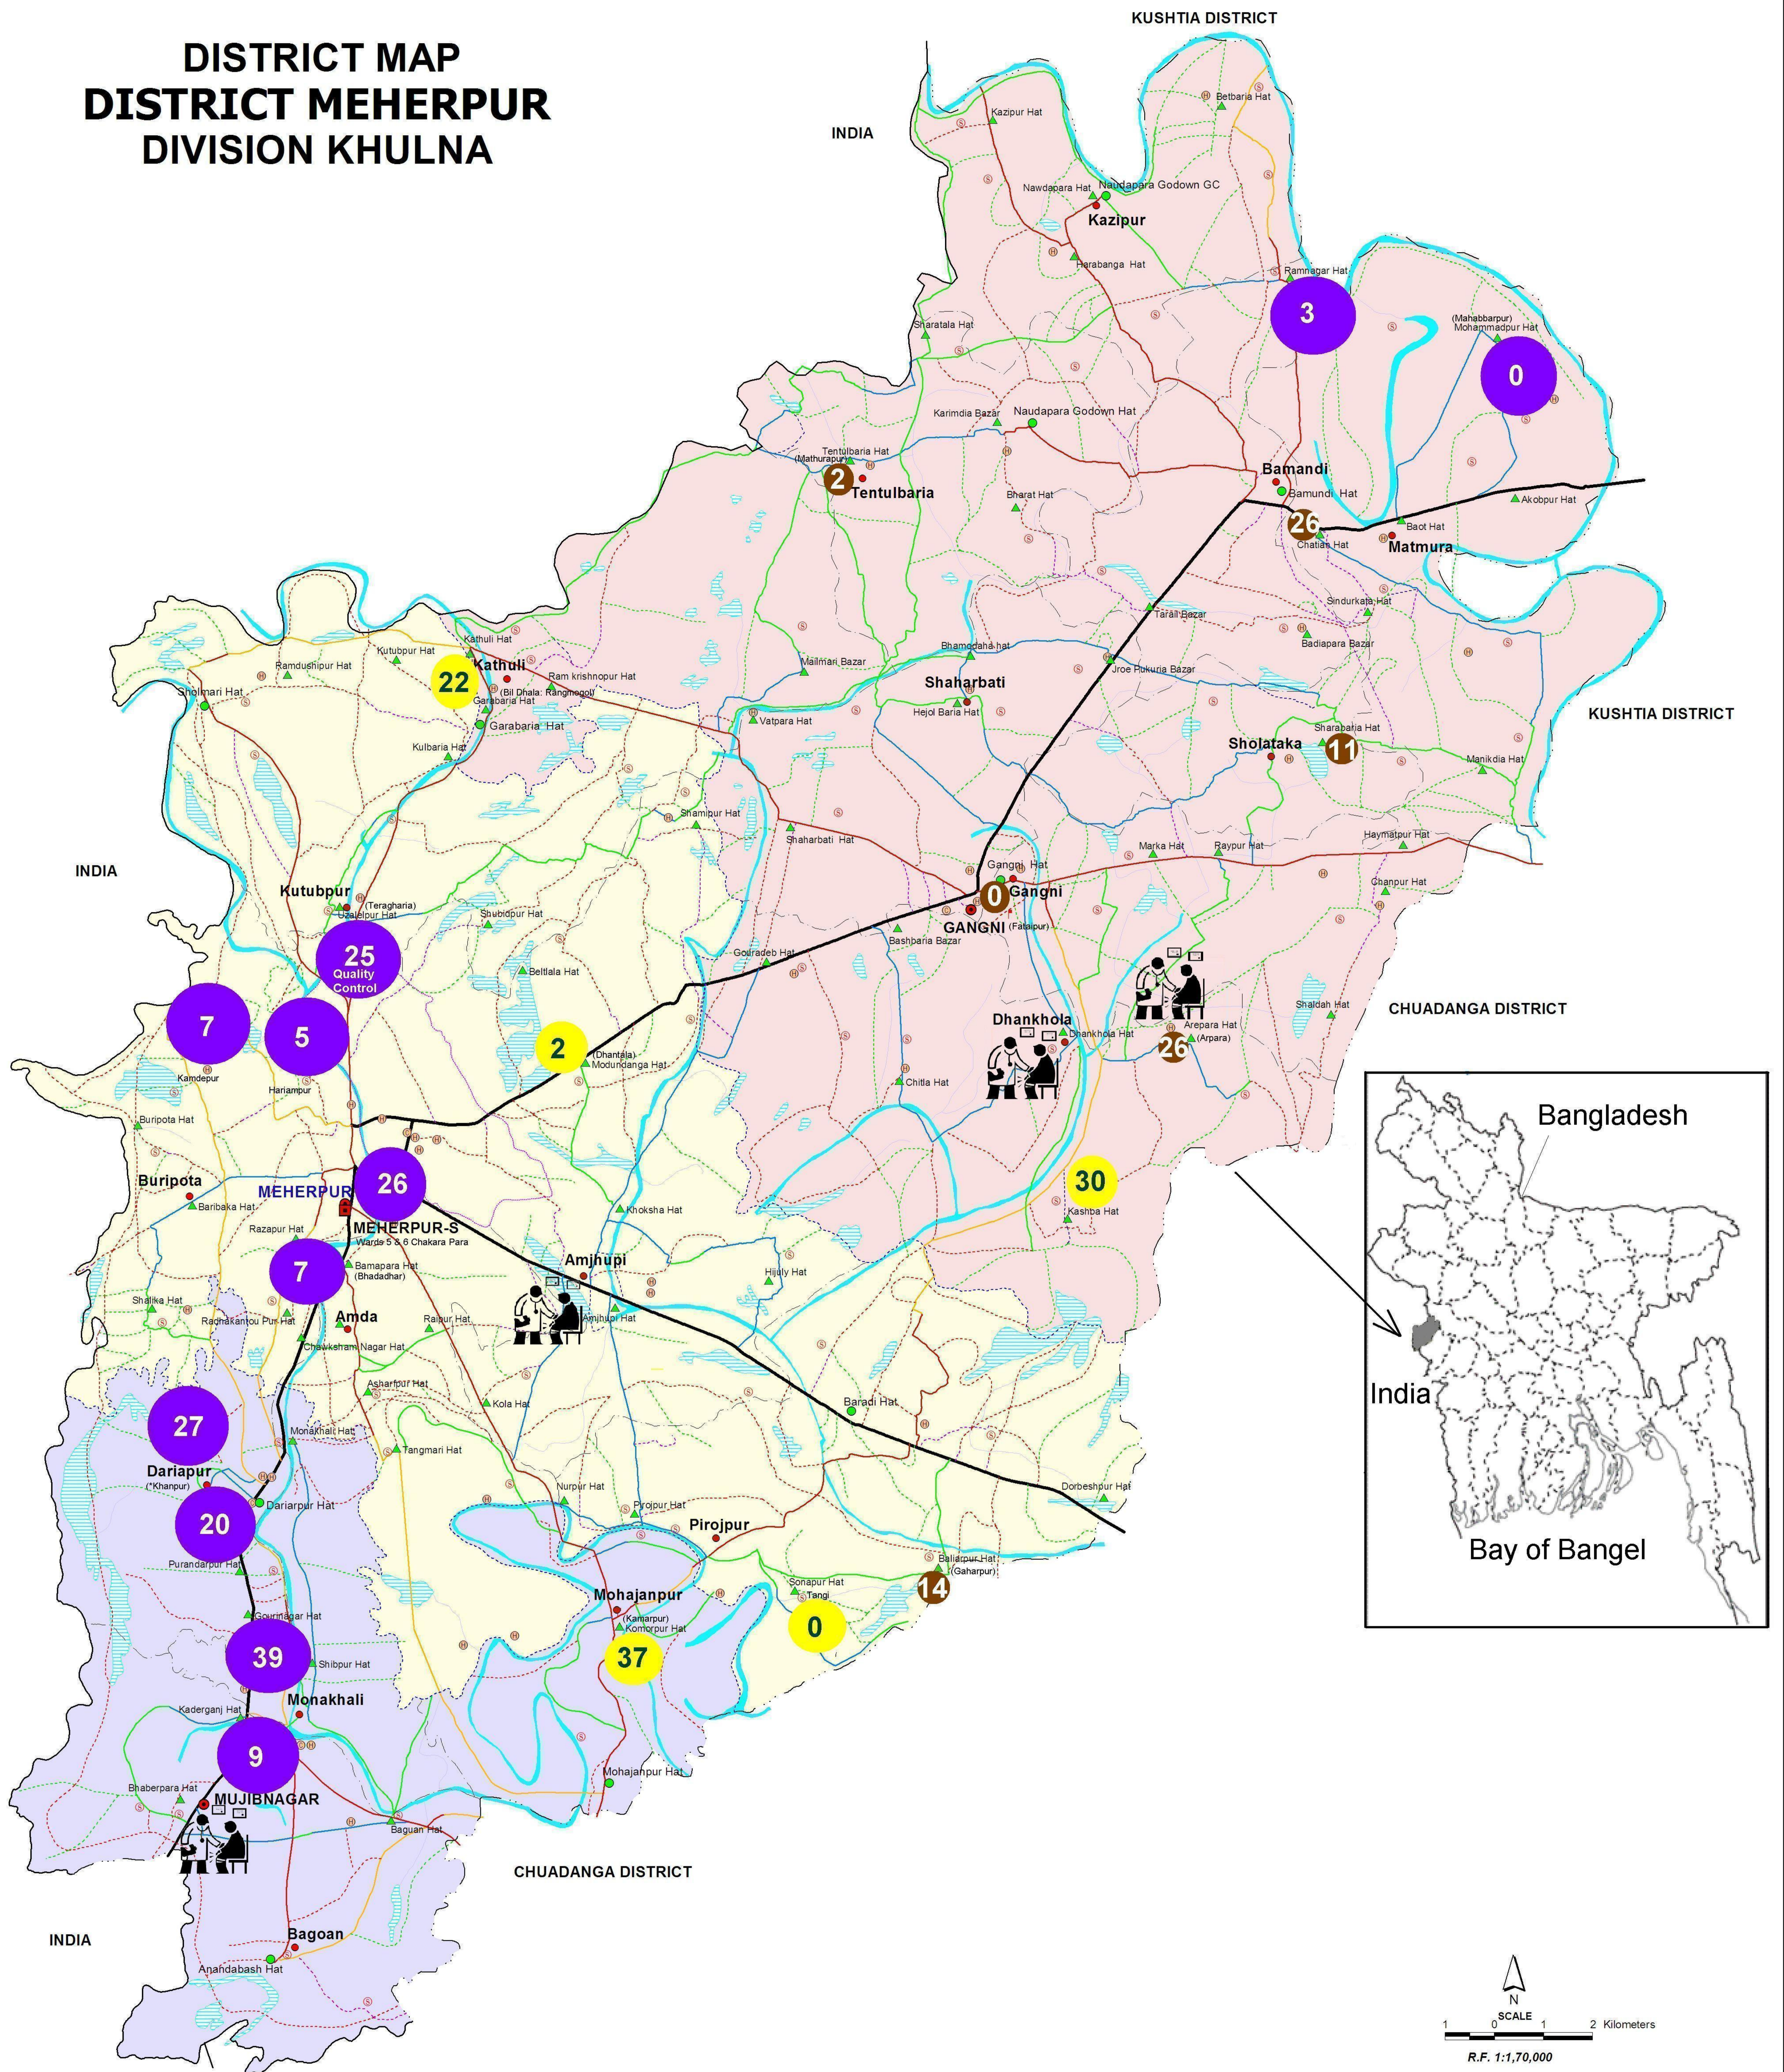

## LEGEND

### Administrative Boundary

- International Boundary
- - - District Boundary
- ..... Upazila Boundary
- Union Boundary
- Municipal Boundary

### Administrative HQs

- District HQ
- Upazila HQ
- Union HQ

### Physical Infrastructures

- National Highways
- Regional Highways
- Zila Road
- Upazila Road (Pucca)
- Upazila Road (Katcha)
- Union Road (Pucca)
- Union Road (Katcha)
- ..... Village Road A (Pucca)
- ..... Village Road A (Katcha)
- ..... Village Road B (Pucca)
- ..... Village Road B (Katcha)
- Railway Network
- Embankment

### Natural Features

- Wide River
- Water Bodies
- Sandy Land / Char
- Khal
- Prevalence of reported lifetime experience of violence-related injury among sampled population
  - 50-100%
  - 25-49.9%
  - 0-24.9%
- No of family reported experience of torture and other cruel, inhuman and degrading treatment or punishment
- Mobile clinic site

### Socio-economic Infrastructures

- Growth Centre
- ▲ Rural Market
- Police Station
- Community Clinic
- Upazila Health Complex
- College
- High School
- University

Compiled from : SPOT Image 1989-90, Aerial Photograph 1983-84, Topographic Maps, Thana Maps, B.B.S and Field Checking 2006  
 Projection : Lambert's Conformal Conic  
 Data Source : GPS Field Survey 1999

PREPARED BY SJW, RCT. BASEMAP: BANGLADESHI LOCAL GOVERNMENT ENGINEERING DEPARTMENT
